# Supplementary material for: Combined Computational–Biochemical Approach Offers an Accelerated Path to Membrane Protein Solubilization
Source: PubMed Central journal article supplement (PMC10685452; doi:10.1021/acs.jcim.3c00917), 2023-11-08
Supplement: ci3c00917_si_001.pdf [file ci3c00917_si_001.pdf]

Supporting Information for

**A combined computational-biochemical approach offers an accelerated path to membrane protein solubilization**

Mariah R. Pierce,<sup>1,‡</sup> Jingjing Ji,<sup>2,‡</sup> Sadie X. Novak,<sup>1</sup> Michelle A. Sieburg,<sup>1</sup> Shivangi Nangia,<sup>3</sup>  
Shikha Nangia,<sup>2,4,\*</sup> and James L. Hougland<sup>1,4,5\*</sup>

<sup>1</sup> Department of Chemistry, Syracuse University, Syracuse, NY 13244, USA

<sup>2</sup> Department of Biomedical and Chemical Engineering, Syracuse University, Syracuse, NY 13244, USA

<sup>3</sup> Department of Chemistry, University of Hartford, West Hartford, CT 06117, USA

<sup>4</sup> BioInspired Syracuse, Syracuse, NY 13244, USA

<sup>5</sup> Department of Biology, Syracuse University, Syracuse, NY 13244, USA

<sup>‡</sup> These authors contributed equally to this work

\*To whom correspondence should be addressed:

Email: snangia@syr.edu, hougland@syr.edu

Phone: (315)443-571, (315) 443-1134

**Supporting Figure S1.** MEGA-9, LMNG, and Fos-choline family expansions do not improve solubilization.

**Supporting Figure S2.** MEGA-9, LMNG, and Fos-choline family expansions showed minimal improvement in hGOAT-eGFP activity.

**Supporting Figure S3.** Convergence analysis for detergent-membrane systems.

**Supporting Figure S4.** Convergence of RMSF of hGOAT residues in DDM within simulation time course confirms well-equilibrated system.

**Supporting Figure S5.** Convergence of RMSF of hGOAT residues in BOG within simulation time course confirms well-equilibrated system.

**Supporting Figure S6.** Convergence of RMSF of hGOAT residues in MEGA-9 within simulation time course confirms well-equilibrated system.

**Supporting Figure S7.** Convergence of RMSF of hGOAT residues in LMNG within simulation time course confirms well-equilibrated system.

**Supporting Figure S8.** Convergence of RMSF of hGOAT residues in FOS-16 within simulation time course confirms well-equilibrated system.

**Supporting Figure S9.** Convergence of RMSF of hGOAT residues in GDN within simulation time course confirms well-equilibrated system.

**Supporting Figure S10.** Convergence of RMSF of hGOAT residues in FOS-12 within simulation time course confirms well-equilibrated system.

**Supporting Figure S11.** Convergence of RMSF of hGOAT residues in CHAPS within simulation time course confirms well-equilibrated system.

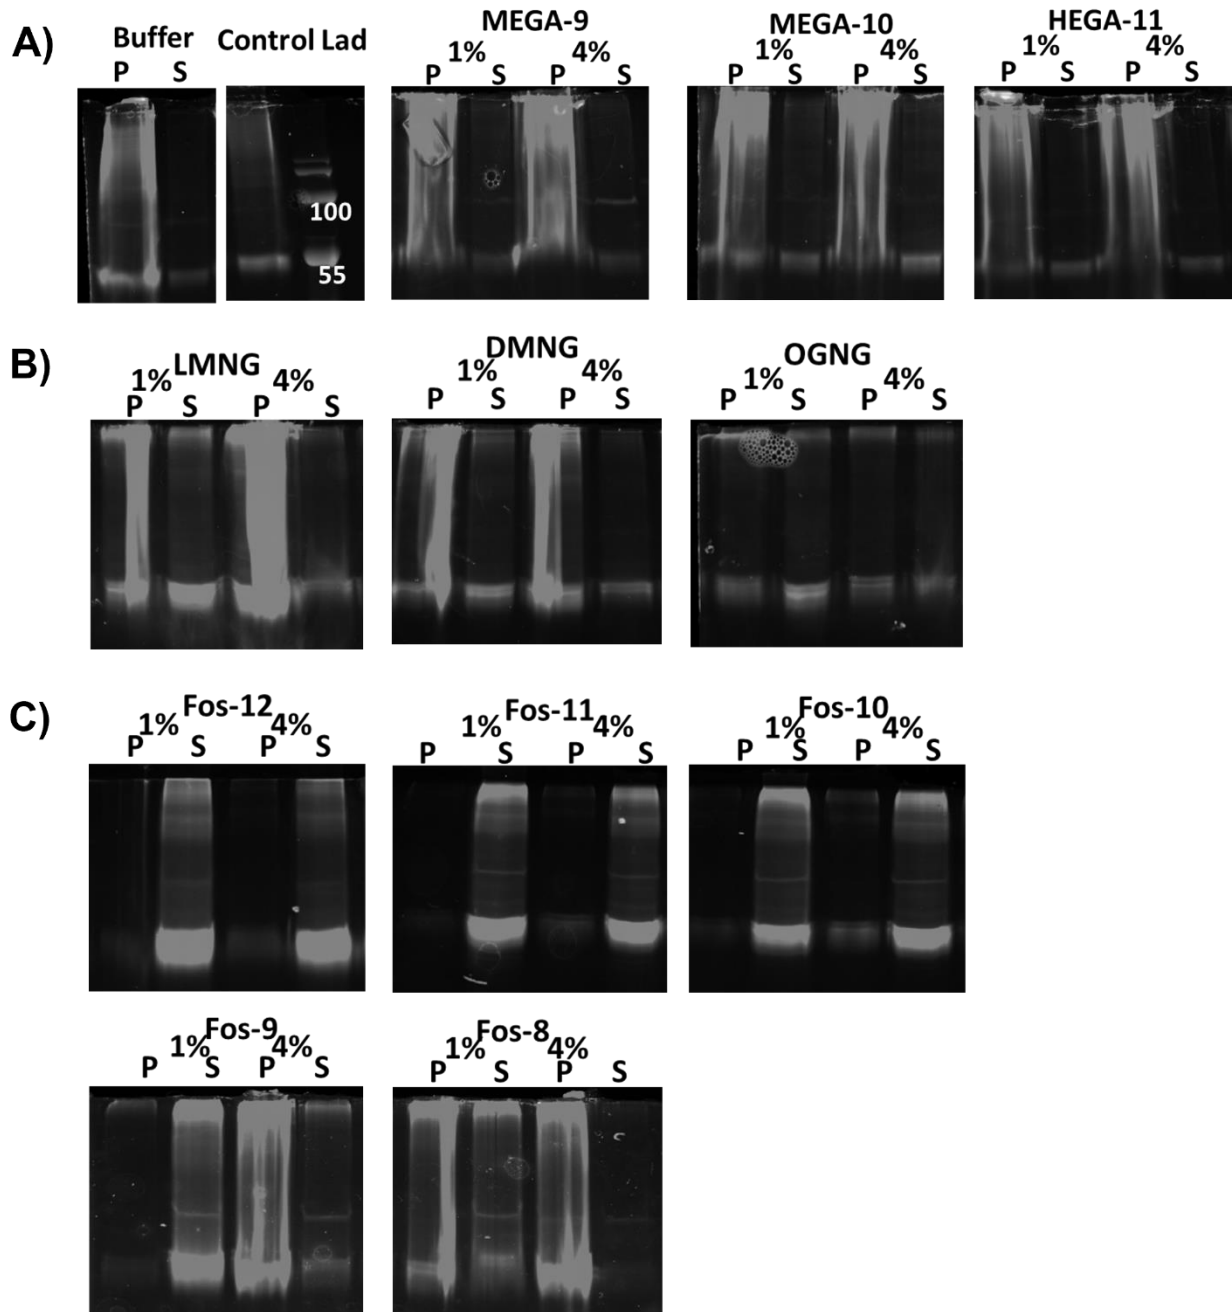

**Supporting Figure S1. MEGA-9, LMNG, and Fos-choline family expansions do not improve solubilization.** A solubilization screening was completed with the expanded MEGA-9, LMNG, and Fos-choline families. Buffer control is identical to that performed for the detergent

solubilizations in the main text. A) MEGA-9 had comparable solubilization to the detergent screen and MEGA-10 did not improve the solubilization. HEGA-11 depicted does not show solubilization in either detergent percentage. B) DMNG showed the majority of the solubilization in the pellet fraction with some hGOAT-eGFP in the supernatant fractions. OGNG shows partial solubilization, but is not improved from the solubilization from LMNG. C) Fos-12 repeated its solubilization pattern from the initial screen, and the foc-choline detergents with shorter alkyl chain lengths show a gradual decrease in hGOAT-eGFP solubilization.

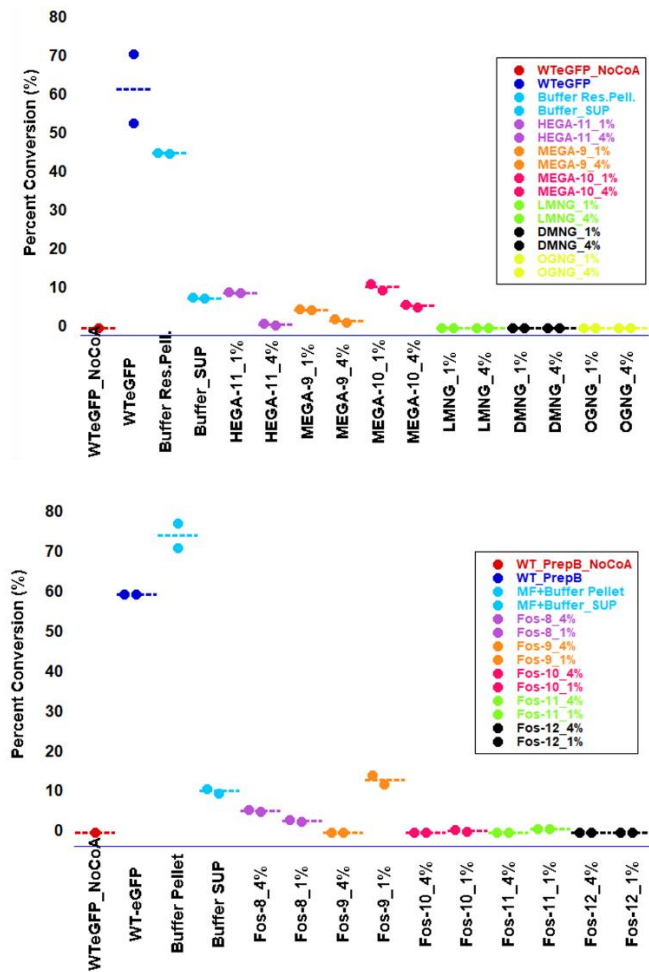

**Supporting Figure S2. MEGA-9, LMNG, and Fos-choline family expansions showed minimal improvement in hGOAT-eGFP activity.** Supernatant fractions of the solubilization reactions tested for ghrelin acylation activity as described in the main text, with negative and positive controls. hGOAT-eGFP solubilized by HEGA-11, MEGA-10, and MEGA-9 all show similar reactivity to the sample without detergent whereas LMNG, DMNG, and OGNG have inhibited hGOAT-eGFP activity. Amongst the fos-choline detergents, only FOS-9 solubilized hGOAT-eGFP exhibited appreciable acylation activity. Activity screening reactions were performed in duplicate and analyzed as described in Experimental Methods.

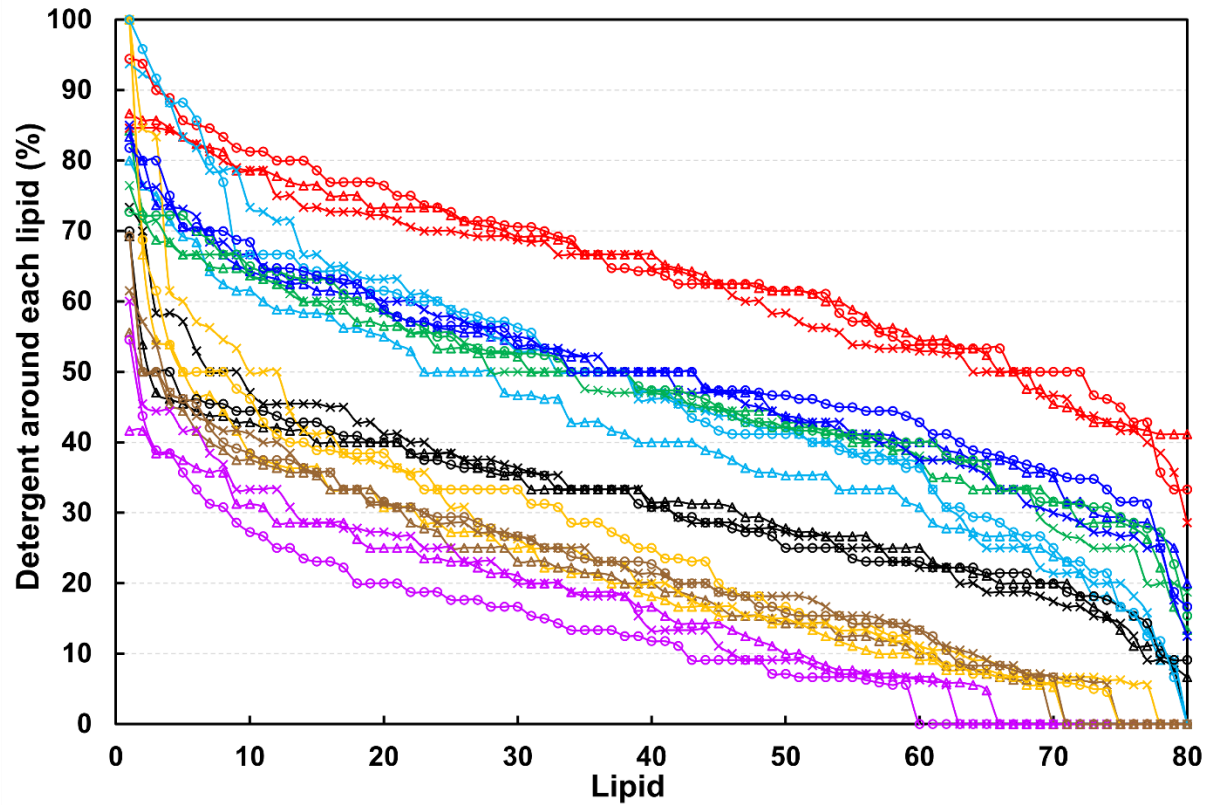

**Supporting Figure S3. Convergence analysis for detergent-membrane systems.** Percent detergent around each lipid, ranked from highest to lowest population DDM (red), BOG (blue), MEGA-9 (green), LMNG (cyan), FOS-16 (black), GDN (yellow), FOS-12 (brown), and CHAPS (pink). For each detergent-membrane system data is shown for three timepoints during the simulation—1000 ns (triangle), 1500 ns (cross), and 2000 ns (circle).

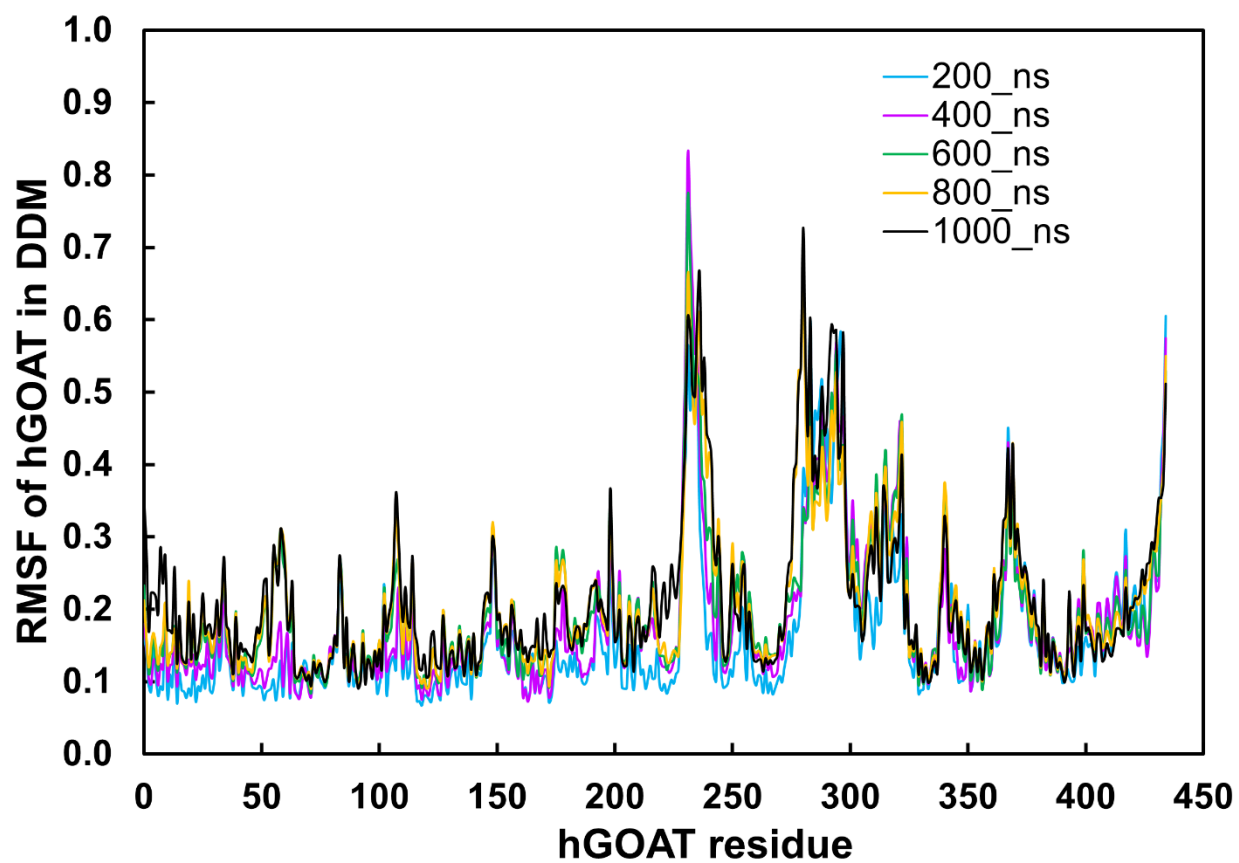

**Supporting Figure S4. Convergence of RMSF of hGOAT residues in DDM within simulation time course confirms well-equilibrated system.** Root mean square fluctuation (RMSF) of hGOAT residues for DDM at 200 (cyan), 400 (purple), 600 (green), 800 (yellow), and 1000 (black) ns.

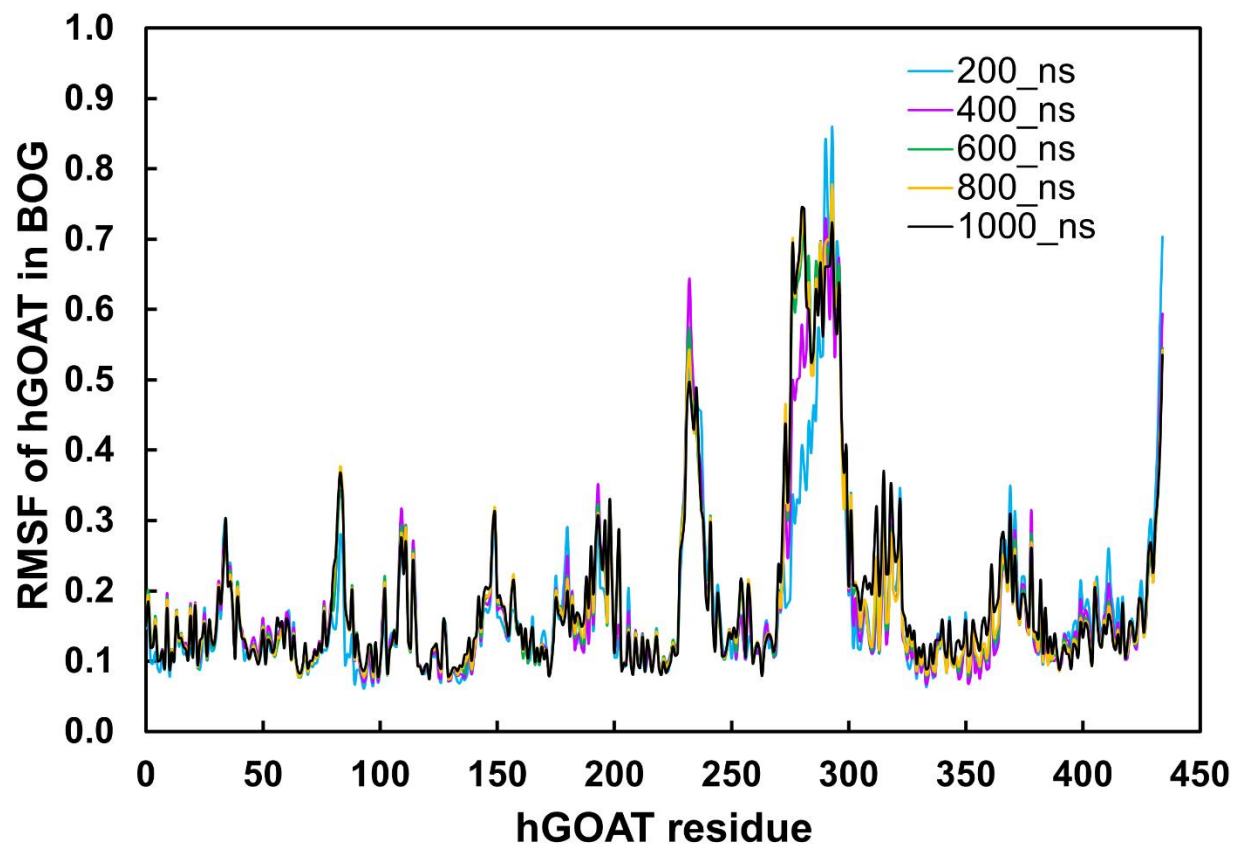

**Supporting Figure S5. Convergence of RMSF of hGOAT residues in BOG within simulation time course confirms well-equilibrated system.** Root mean square fluctuation (RMSF) of hGOAT residues for BOG at 200 (cyan), 400 (purple), 600 (green), 800 (yellow), and 1000 (black) ns.



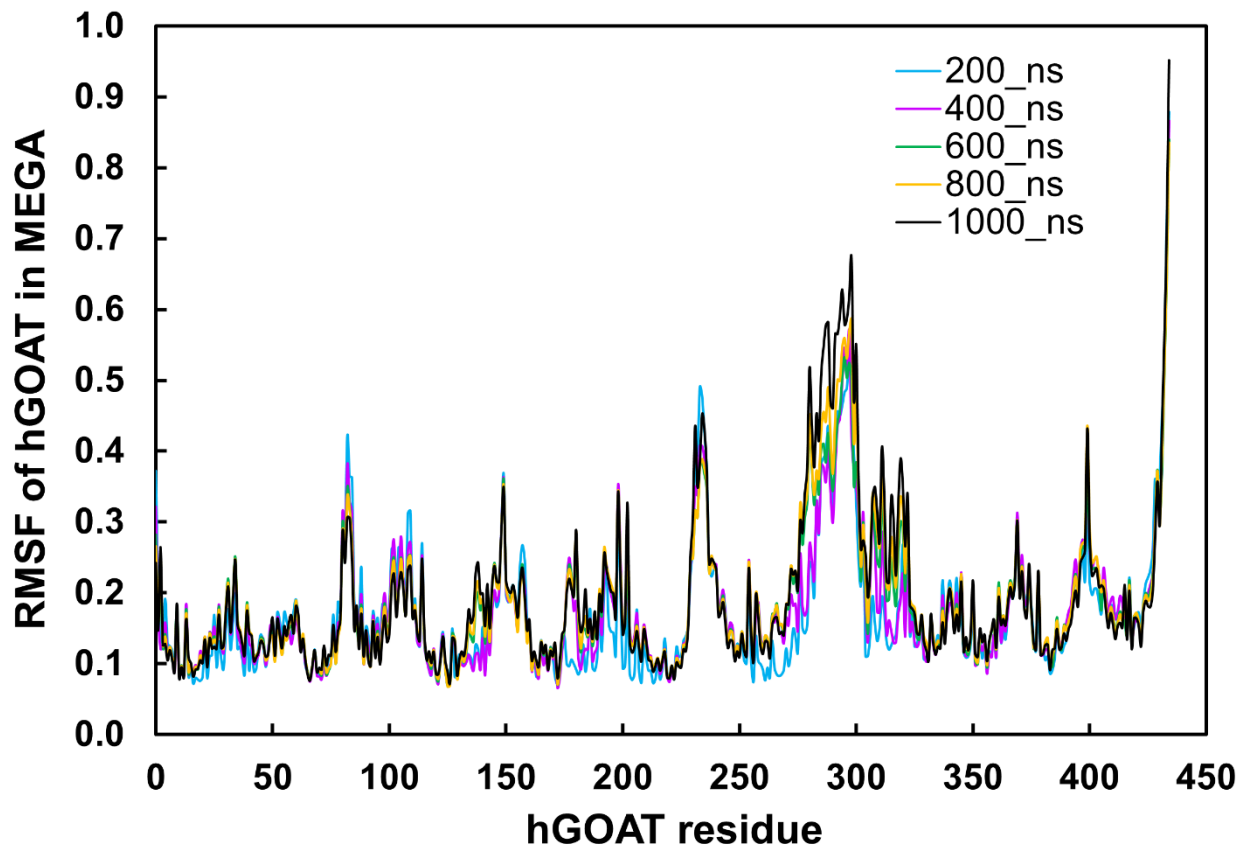

**Supporting Figure S6. Convergence of RMSF of hGOAT residues in MEGA-9 within simulation time course confirms well-equilibrated system.** Root mean square fluctuation (RMSF) of hGOAT residues for MEGA-9 at 200 (cyan), 400 (purple), 600 (green), 800 (yellow), and 1000 (black) ns.

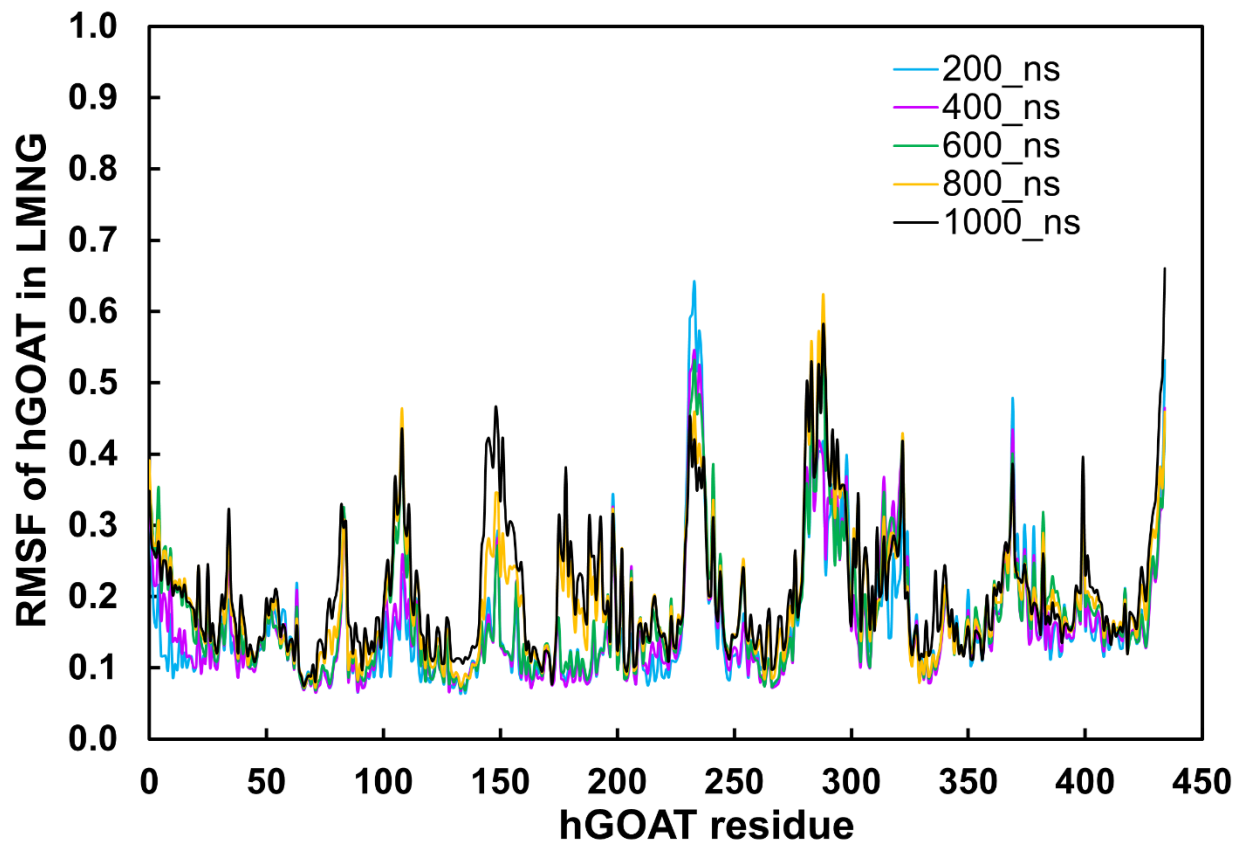

**Supporting Figure S7. Convergence of RMSF of hGOAT residues in LMNG within simulation time course confirms well-equilibrated system.** Root mean square fluctuation (RMSF) of hGOAT residues for LMNG at 200 (cyan), 400 (purple), 600 (green), 800 (yellow), and 1000 (black) ns.

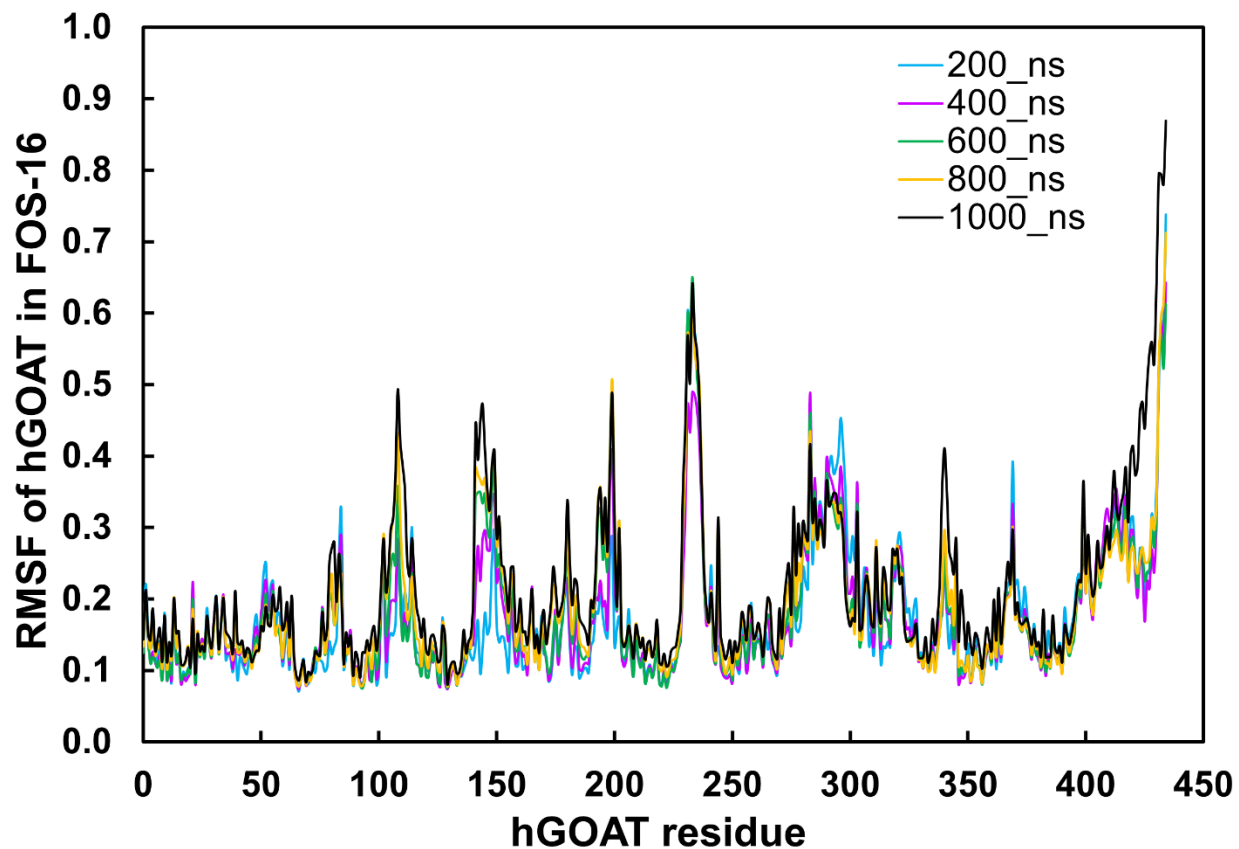

**Supporting Figure S8. Convergence of RMSF of hGOAT residues in FOS-16 within simulation time course confirms well-equilibrated system.** Root mean square fluctuation (RMSF) of hGOAT residues for FOS-16 at 200 (cyan), 400 (purple), 600 (green), 800 (yellow), and 1000 (black) ns.

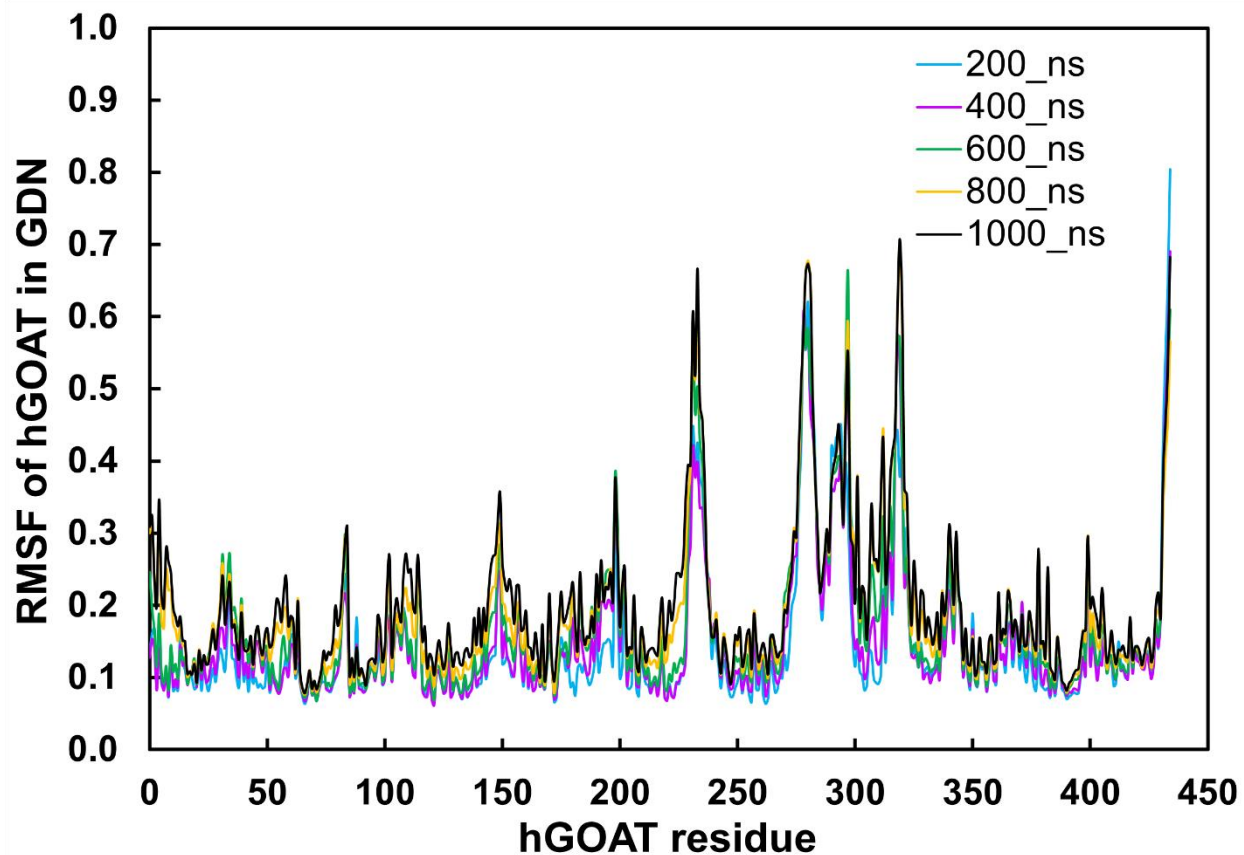

**Supporting Figure S9. Convergence of RMSF of hGOAT residues in GDN within simulation time course confirms well-equilibrated system.** Root mean square fluctuation (RMSF) of hGOAT residues for GDN at 200 (cyan), 400 (purple), 600 (green), 800 (yellow), and 1000 (black) ns.

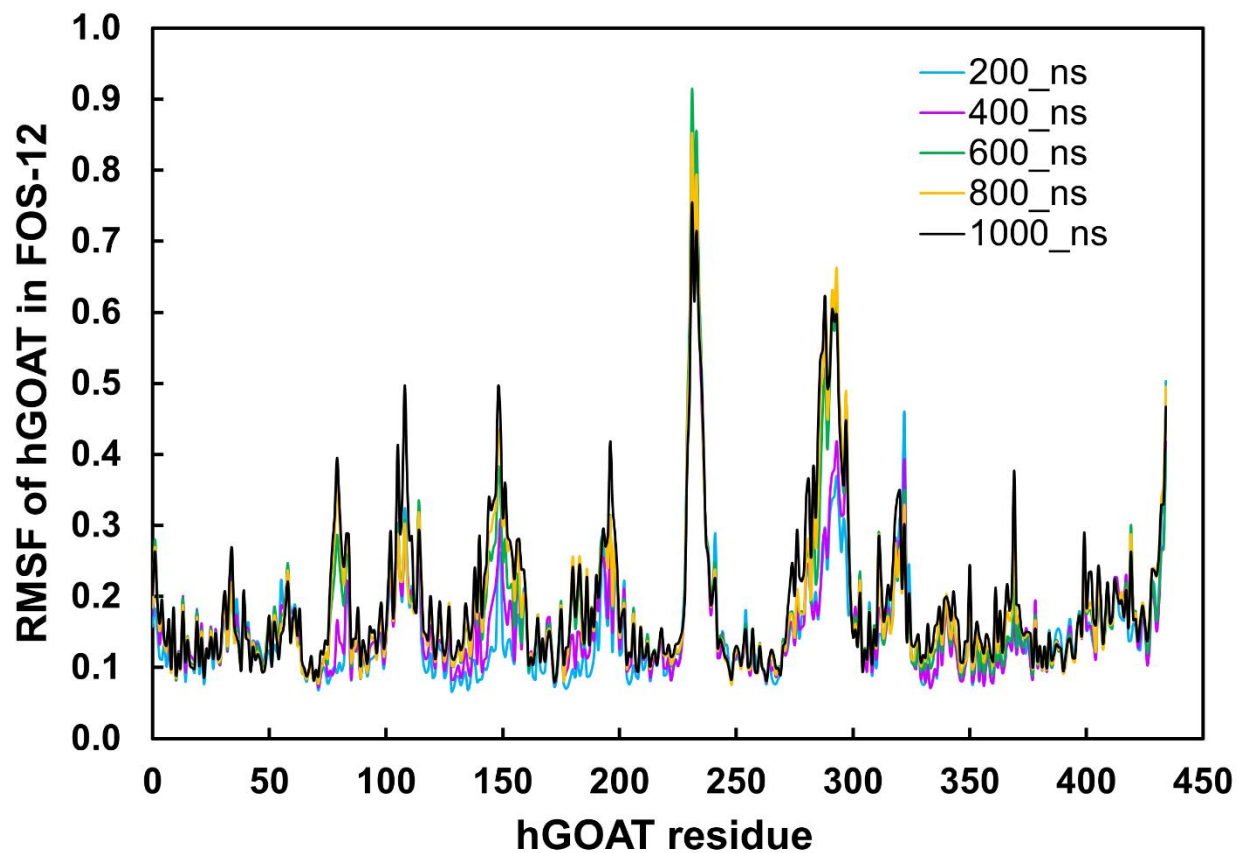

**Supporting Figure S10. Convergence of RMSF of hGOAT residues in FOS-12 within simulation time course confirms well-equilibrated system.** Root mean square fluctuation (RMSF) of hGOAT residues for FOS-12 at 200 (cyan), 400 (purple), 600 (green), 800 (yellow), and 1000 (black) ns.

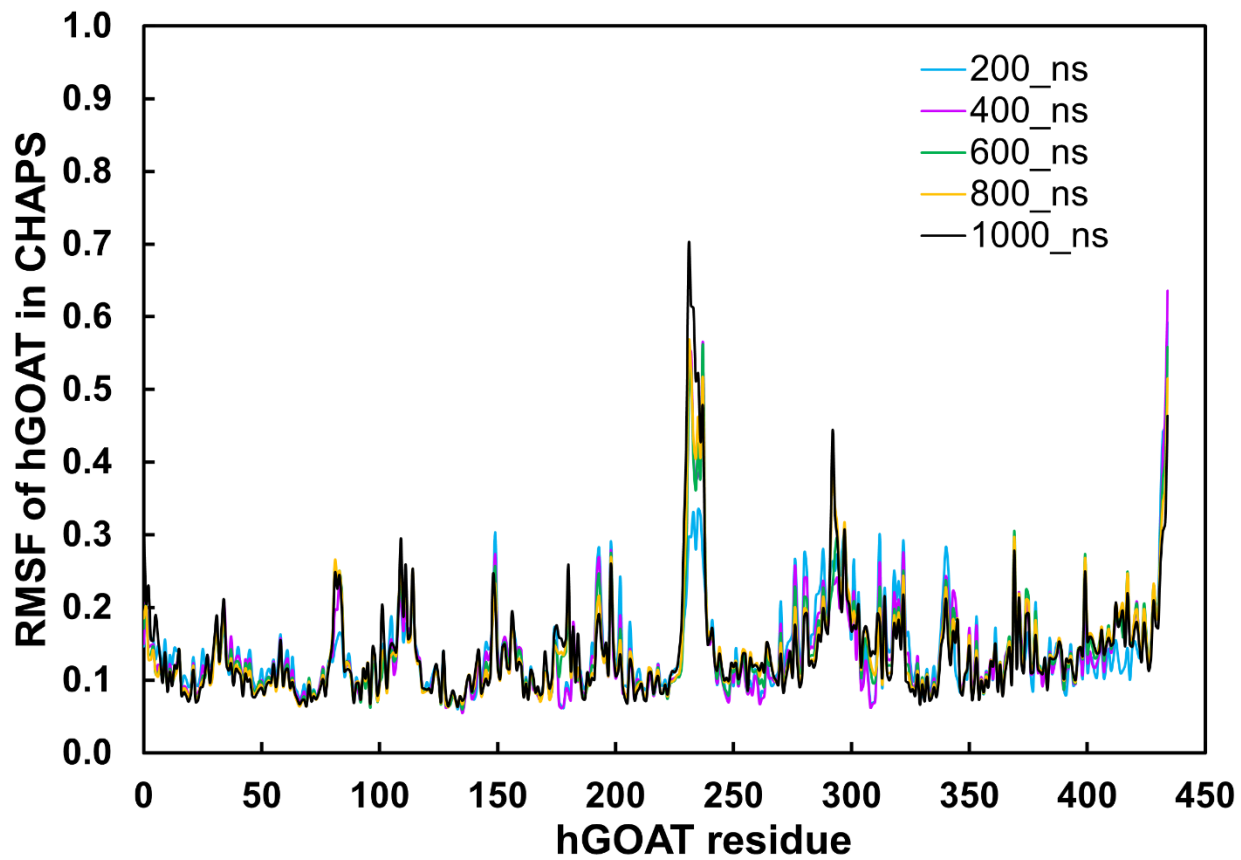

**Supporting Figure S11. Convergence of RMSF of hGOAT residues in CHAPS within simulation time course confirms well-equilibrated system.** Root mean square fluctuation (RMSF) of hGOAT residues for CHAPS at 200 (cyan), 400 (purple), 600 (green), 800 (yellow), and 1000 (black) ns.
